# Supplementary material for: An integrated approach to the study of the recognition of guests containing CH3 and CH2 acidic groups by differently rigidified cone p-tert-butylcalix[4]arene derivativesElectronic supplementary information (ESI) available: experimental conditions used for calorimetric measurements. See http://www.rsc.org/suppdata/nj/b3/b308996g/
Source: Royal Society of Chemistry journal article supplement (doi:10.1039/b308996g), 2004-01-01
Supplement: b308996g.doc [file b308996g.doc]

Experimental conditions used for calorimetric measurements on CH3CN, ClCH2CN, CH3CH2CN e CH2Cl2 with host **1** in CCl4 at 25 °C.

| C°H  mol dm-3 | C°CH3CN  mol dm-3 | C°ClCH2CN  mol dm-3 | C°CH3CH2CN  mol dm-3 | C°CH2Cl2  mol dm-3 | [G]/[H] |
| --- | --- | --- | --- | --- | --- |
| 0.00127 | 0.53203 |  |  |  | 17.23 |
| 0.00129 | 0.53203 |  |  |  | 16.96 |
| 0.00131 | 0.53203 |  |  |  | 16.70 |
| 0.00130 | 0.53203 |  |  |  | 16.83 |
| 0.00144 | 0.53203 |  |  |  | 15.19 |
| 0.00133 |  | 0.50564 |  |  | 15.63 |
| 0.00129 |  | 0.50564 |  |  | 16.12 |
| 0.00127 |  | 0.50564 |  |  | 16.37 |
| 0.00127 |  | 0.50564 |  |  | 16.37 |
| 0.00130 |  | 0.50564 |  |  | 15.99 |
| 0.00128 |  | 0.50564 |  |  | 16.24 |
| 0.00135 |  | 0.50564 |  |  | 15.40 |
| 0.00141 |  |  | 0.81432 |  | 23.75 |
| 0.00125 |  |  | 0.81432 |  | 26.78 |
| 0.00127 |  |  | 0.81432 |  | 26.36 |
| 0.00130 |  |  | 0.81432 |  | 25.76 |
| 0.00124 |  |  | 0.81432 |  | 27.00 |
| 0.00128 |  |  | 0.81432 |  | 26.16 |
| 0.00136 |  |  | 0.81432 |  | 24.62 |
| 0.00112 |  |  | 1.56600 |  | 57.5 |
| 0.00129 |  |  | 1.56600 |  | 49.9 |
| 0.00133 |  |  |  | 0.61670 | 19.07 |
| 0.00127 |  |  |  | 0.61670 | 19.97 |
| 0.00131 |  |  |  | 0.61670 | 19.36 |
| 0.00129 |  |  |  | 0.61670 | 19.66 |
| 0.00130 |  |  |  | 0.61670 | 19.51 |
